# Supplementary material
Source: Springer Nature journal article supplement (https://www.springermedizin.de/resource/supplementary/12891_2009_869_MOESM4_ESM.pdf/9506594)
Supplement: MOESM4 [file 9506594]

| Symbol | Full Name                        | Transcript ID      | Gene Type      |
|--------|----------------------------------|--------------------|----------------|
| Nqo1   | NAD(P)H dehydrogenase, quinone 1 | ENSRNOT00000017174 | Protein coding |
| Pdpn   | podoplanin                       | ENSRNOT00000020316 | Protein coding |
| Cxcl3  | chemokine (C-X-C motif) ligand 3 | ENSRNOT00000033592 | Protein coding |
| Rad23b | RAD23 homolog B                  | ENSRNOT00000021629 | Protein coding |

Table I. The potential regulated gene targets of rno-miR-21
